# Supplementary material for: Exploring the Association Between Upadacitinib and Venous Thromboembolism: An Integrated Analysis of Adverse Drug Events and Network Toxicology Mechanisms
Source: Research Square preprint supplement (doi:10.21203/rs.3.rs-7223810/v1), 2025-10-10
Supplement: Supplementary file 1 [file 6f497fe95b72b868922dad9d.docx]

**List of PTs included in venous thromboembolism events：**

Aseptic cavernous sinus thrombosis

Axillary vein thrombosis

Brachiocephalic vein occlusion

Brachiocephalic vein thrombosis

Budd-Chiari syndrome

Cavernous sinus thrombosis

Cerebral venous sinus thrombosis

Cerebral venous thrombosis

Deep vein thrombosis

Embolism venous

Hepatic vein embolism

Hepatic vein occlusion

Hepatic vein thrombosis

Homans' sign positive

Iliac vein occlusion

Inferior vena cava syndrome

Inferior vena caval occlusion

Jugular vein embolism

Jugular vein occlusion

Jugular vein thrombosis

Mahler sign

May-Thurner syndrome

Mesenteric vein thrombosis

Mesenteric venous occlusion

Obstetrical pulmonary embolism

Obstructive shock

Ophthalmic vein thrombosis

Ovarian vein thrombosis

Paget-Schroetter syndrome

Pelvic venous thrombosis

Penile vein thrombosis

Peripheral vein occlusion

Peripheral vein thrombus extension

Portal vein cavernous transformation

Portal vein embolism

Portal vein occlusion

Portal vein thrombosis

Portosplenomesenteric venous thrombosis

Post thrombotic syndrome

Postpartum venous thrombosis

Pulmonary embolism

Pulmonary infarction

Pulmonary microemboli

Pulmonary thrombosis

Pulmonary vein occlusion

Pulmonary veno-occlusive disease

Pulmonary venous thrombosis

Renal vein embolism

Renal vein occlusion

Renal vein thrombosis

Retinal vein occlusion

Retinal vein thrombosis

Septic pulmonary embolism

SI QIII TIII pattern

Splenic vein occlusion

Splenic vein thrombosis

Subclavian vein occlusion

Subclavian vein thrombosis

Superior sagittal sinus thrombosis

Superior vena cava occlusion

Superior vena cava syndrome

Thrombophlebitis

Thrombophlebitis migrans

Thrombophlebitis neonatal

Thrombophlebitis superficial

Thrombosed varicose vein

Thrombosis corpora cavernosa

Transverse sinus thrombosis

Vena cava embolism

Vena cava thrombosis

Venogram abnormal

Venoocclusive disease

Venoocclusive liver disease

Venous occlusion

Venous recanalisation

Venous thrombosis

Venous thrombosis in pregnancy

Venous thrombosis limb

Venous thrombosis neonatal

Visceral venous thrombosis
