# Supplementary material for: Exploring the Association Between Upadacitinib and Venous Thromboembolism: An Integrated Analysis of Adverse Drug Events and Network Toxicology Mechanisms
Source: Research Square preprint supplement (doi:10.21203/rs.3.rs-7223810/v1), 2025-10-10
Supplement: Supplementary file 2 [file 76041b8d77b26c332ece4ada.docx]

1. ROR（,Reporting Odds Ratio）

**Principle**: ROR is an indicator used to measure the strength of association between a drug and an adverse event. It calculates the ratio of the occurrence rate of both the drug and the event together to the occurrence rate of the drug and event separately. It is used to compare the relationship strength between a specific drug and an adverse event.

**Formula**:

*a*: Number of reports where the drug and adverse event occurred together;

*b*:Number of reports where the drug and adverse event did not occur together

*c:*Number of reports in which the drug occurred with the adverse event in the control group

*d*:Number of reports in which neither the drug nor the adverse event occurred in the control group

**Positive Signal Detection Criteria**: Lower limit of 95% confidence interval (CI) > 1, N ≥ 3

95% CI=，N: the number of reports

2.PRR（Proportional Reporting Ratio）

**Principle**: PRR is a ratio that measures the proportion of reports for a specific drug associated with an adverse event. It is used to assess the strength of the association between a drug and a particular adverse event. The higher the PRR, the stronger the association.

**Formula**:

*a:* Number of reports where both the drug and adverse event occur

*b*: Number of reports where the drug occurs but not the adverse event

*c*: Number of reports where the adverse event occurs with any drug

*d*: Number of reports where the adverse event does not occur with any drug

**Positive Signal Detection Criteria**: PRR≥2, ≥ 4, N ≥ 3

; N: the number of reports

3. BCPNN（ Bayesian Confidence Propagation Neural Network）

**Principle**: BCPNN performs signal detection of the association between drugs and adverse events using Bayesian inference. It assesses the risk based on the joint probability distribution of drug-event combinations, and is particularly effective in detecting strong signals when event reports are sparse.

**Formula**:

A represents the association between the drug and the event; B represents the reported drug and adverse event combination; P(A|B) is the probability of the drug-event association given the report data; P(B|A) is the joint probability of the drug-event combination; P(A) is the prior probability of the drug-event association; P(B) is the prior probability of the reported data.

**Positive Signal Detection Criteria**: The positive signal is detected when IC025(the lower limit of 95% CI of the IC) > 0.

IC= ; 95 % CI=

E(IC) is the expected value of IC;V(IC) is the variance of IC.

4. MGPS（Multi-item Gamma Poisson Shrinker）

**rinciple**: MGPS is a statistical model based on the Poisson distribution, used for signal detection, particularly effective in handling large-scale datasets. It combines both the Gamma distribution and Poisson distribution to analyze the correlation between drugs and adverse events. The model is designed to reduce noise and improve the accuracy of signal detection.

The Bayesian inference formula is as follows:

is the estimated correlation value between the drug and adverse events; : ​ is the report count for a specific drug-event combination; is the expected number of reports; is the variance of the report count; α is the adjustment factor.

**Positive Signal Detection Criterion**: The positive signal is detected when **EBGM05** (the lower limit of the 95% confidence interval of EBGM) is greater than 2.

The EBGM is calculated as:

EBGM=,95 % CI ; 95%CI=
