# Supplementary material for: Exploring the Association Between Upadacitinib and Venous Thromboembolism: An Integrated Analysis of Adverse Drug Events and Network Toxicology Mechanisms
Source: Research Square preprint supplement (doi:10.21203/rs.3.rs-7223810/v1), 2025-10-10
Supplement: Supplementary file 3 [file a82c72c104687b64acac7e23.docx]

| PTNAME | Upadacitinib-associated VTE AEs as PSn | ROR  (95%Cl) | PRR  () | EBGM  (EBGM05) | IC  (IC025) |
| --- | --- | --- | --- | --- | --- |
| Pulmonary embolism | 322 | 1.36*  (1.22 - 1.51) | 1.36  (30.1 ) | 1.36  (1.24) | 0.44*  (0.28) |
| Deep vein thrombosis | 173 | 1.05  (0.91 - 0.22 ) | 1.05  (0.44) | 1.05  (0.93) | 0.07  (-0.15) |
| Cavernous sinus thrombosis | 2 | 3.23  (0.80 - 12.97) | 3.23  (3.04) | 3.21  (1.00) | 1.68  (0.00) |
| Pulmonary thrombosis | 207 | 7.94*  (6.92 - 9.12) | 7.93*  (1228.84) | 7.79*  (6.94) | 2.96 *  (2.76) |
| Venous occlusion | 12 | 2.63 *  (1.49 - 4.65) | 2.63 *  (12.08) | 2.62  (1.63) | 1.39 *  (0.59) |
| Pulmonary infarction | 5 | 0.82  (0.34 - 1.97) | 0.82  (0.20) | 0.82  (0.39) | -0.29  (-1.47) |
| Thrombophlebitis | 13 | 1.47  (0.85 - 2.54) | 1.47  (1.95) | 1.47  (0.93) | 0.55  (-0.22) |
| Cerebral venous sinus thrombosis | 5 | 1.09  (0.45 - 2.63) | 1.09  (0.04) | 1.09  (0.52) | 0.13  (-1.05) |
| Pportal vein thrombosis | 15 | 1.94 *  (1.17 - 3.23) | 1.94*  (6.84) | 1.94 *  (1.27) | 0.96 *  (0.23) |
| Venous thrombosis limb | 24 | 4.33 *  (2.89 - 6.47) | 4.33 *  (60.66) | 4.29 *  (3.06) | 2.10 *  (1.52) |
| Retinal vein occlusion | 24 | 3.54*  (2.37 - 5.29) | 3.54*  (43.35) | 3.52*  (2.51) | 1.81*  (1.23) |
| Cerebral venous thrombosis | 4 | 0.89  (0.33 - 2.37) | 0.89  (0.05) | 0.89  (0.39) | -0.17  (-1.46) |
| Thrombosed varicose vein | 2 | 15.03  (3.66 - 61.77) | 15.03  (25.19) | 14.49*  (4.44) | 3.86 *  (2.14) |
| Mesenteric vein thrombosis | 4 | 1.65  (0.62 - 4.41) | 1.65  (1.02) | 1.65  (0.72) | 0.72  (-0.57) |
| Superior vena cava occlusion | 1 | 1.53  (0.21 - 10.89) | 1.53  (0.18) | 1.53  (0.29) | 0.61  (-1.44) |
| Axillary vein thrombosis | 1 | 1.11  (0.16 - 7.92) | 1.11  (0.01) | 1.11  (0.22) | 0.15  (-1.89) |
| Vena cava thrombosis | 3 | 0.72  (0.23 - 2.24) | 0.72  (0.32) | 0.72  (0.28) | -0.47  (-1.91) |
| Superior sagittal sinus thrombosis | 1 | 0.49  (0.07 - 3.46) | 0.49  (0.54) | 0.49  (0.09) | -1.04  (-3.08) |
| Pportal vein embolism | 1 | 17.89  ( .41 - 133.03) | 17.89  (15.22) | 17.13 *  (3.20) | 4.10*  (1.97) |
| Subclavian vein thrombosis | 1 | 0.35  (0.05 - 2.47) | 0.35  (1.22) | 0.35  (0.07) | -1.52  (-3.56) |
| Jugular vein occlusion | 1 | 8.00  (1.10 - 57.95) | 8.00  (5.99) | 7.85  (1.50) | 2.97 *  (0.89) |
| Post thrombotic syndrome | 1 | 0.87  (0.12 - 6.22) | 0.87  (0.02) | 0.87  (0.17) | -0.19  (-2.24) |
| Pelvic venous thrombosis | 2 | 0.54  (0.13 - 2.16) | 0.54  (0.79) | 0.54  (0.17) | -0.89  (-2.56) |
| Ophthalmic vein thrombosis | 1 | 1.70  (0.24 - 12.12) | 1.70  (0.29) | 1.70  (0.33) | 0.76  (-1.29) |

Table 2. Results of disproportionality analysis based on Upadacitinib-associated VTE case reporting to FAERS (2004 Q1–2025 Q1).
