# Supplementary material for: Exploring the Association Between Upadacitinib and Venous Thromboembolism: An Integrated Analysis of Adverse Drug Events and Network Toxicology Mechanisms
Source: Research Square preprint supplement (doi:10.21203/rs.3.rs-7223810/v1), 2025-10-10
Supplement: Supplementary file 4 [file e8a0c09b00309a2c8ac938dd.docx]

|  | Upadacitinib |
| --- | --- |
| Case number | 712 |
| Sex |  |
| Male | 414 (58.1%) |
| Female | 245 (34.4%) |
| Missing | 53 (7.4%) |
| Age |  |
| 0-17 years | 0 (0%) |
| 18-64 years | 7 (1.0%) |
| 65-85 years | 285 (40.0%) |
| ≥85 years | 156 (21.9%) |
| Missing | 264 (37.1%) |
| Outcomes |  |
| Death | 30 (4.2%) |
| Life-threatening | 42 (5.9%) |
| Hospitalization | 324 (45.5%) |
| Disability | 1 (0.1%) |
| Other serious | 315 (44.2%) |
| Serious cases | 11 (1.5%) |
| NO Serious cases | 701 (98.5%) |
| Fatal cases | 682 (95.8%) |
| NO Fatal cases | 30 (4.2%) |

Table.1: Characteristics of Upadacitinib-associated VTE reports in the FAERS database (2004 Q1–2025Q1)
